# Supplementary material
Source: ML conference proceedings conference paper supplement (https://openaccess.thecvf.com/content/CVPR2022/html/Kim_L-Verse_Bidirectional_Generation_CVPR_2022_paper.html)
Supplement: Supplementary file 1 [file Kim_L-Verse_Bidirectional_Generation_CVPR_2022_supplemental.pdf]

## A. Details for AugVAE

### A.1. Architecture

The AugVAE encoder and decoder are ResNet [14] with bottleneck-style Resblocks. Our AugVAE is specifically based on the encoder-decoder from official VQGAN [12] implementation available at <https://github.com/CompVis/taming-transformers>. From VQGAN implementation, we removed the attention block and applied the modification we describe in 3.3. The high-level architecture of our AugVAE is depicted in Figure 9. Before we start AugVAE-SL fine-tuning, we change the model architecture by removing  $16 \times 16$  and  $8 \times 8$  latent map from AugVAE-ML and replacing concatenation with  $1 \times 1$  convolution for channel upsampling. Precise details for the architecture are given in files `latent-verse/models/vqvae.py` and `latent-verse/modules/vqvae/vae.py` of our source code available at: <https://github.com/tgisaturday/L-Verse>.

### A.2. Training

Our AugVAE is trained on ImageNet1K [8]. We resize each image into  $256 \times 256 \times 3$  and apply random crop with 0.75 crop ratio for training. We train both AugVAE-ML and AugVAE-SL using AdamW [26] optimizer with  $\beta_1 = 0.9$ ,  $\beta_2 = 0.999$ ,  $\epsilon = 10e - 8$ , weight decay multiplier  $1e - 5$ , and the learning rate  $4.5e - 6$  multiplied by the batch size. We half the learning rate each time the training loss appeared to plateau. For the loss term, we use a combination of mean-squared-error (MSE) and LPIPS [52] losses between the input and the reconstructed image. For stable training, we multiply the LPIPS loss by 0.1.

## B. Details for BiART

### B.1. Architecture

Our BiART is similar to the GPT architecture [3]. We utilize the `minGPT` implementation of GPT architectures available at <https://github.com/karpathy/minGPT>. We only add segment embedding with dimension size 256 for [REF] and [GEN]. Each segment embedding is added to the positional encoding of an input token. We use a 32-layer decoder-only transformer with 1024 dimensional states and 16 masked self-attention heads. While BiART uses an integrated embedding matrix for image and text tokens, each token groups are separately indexed from 0 to 8191 and from 8192 to 57999. Special tokens [PAD] (*padding*), [SOC] (*start-of-text*), and [SOI] (*start-of-image*) are indexed from 58000 to 58002.

| Dataset            | FID  |
|--------------------|------|
| CelebA-HQ [25]     | 7.24 |
| FFHQ [19]          | 4.92 |
| AFHQ [5]           | 4.36 |
| MS-COCO [24]       | 4.77 |
| OpenImages V6 [21] | 3.15 |

Table 4. Reconstruction Fréchet Inception Distance (FID) of AugVAE on various datasets. For all settings, we use ImageNet1K trained AugVAE-SL without any finetuning on each dataset. Images are resized to  $256 \times 256$  with LANCZOS [6] filter.

### B.2. Training

BiART is trained on MS-COCO Captions [24] and Conceptual Captions [39]. We resize each image into  $256 \times 256 \times 3$  and apply random crop with 0.75 crop ratio for training. We apply BPE dropout [30] with a rate of 0.1 to our byte-pair encoder. We also apply residual, embedding, and attention dropouts [42] with a rate of 0.1. We train BiART using AdamW [26] optimizer with  $\beta_1 = 0.9$ ,  $\beta_2 = 0.95$ ,  $\epsilon = 1e - 8$ , weight decay multiplier  $1e - 2$ , and the learning rate  $4.5e - 7$  multiplied by the batch size. We don't apply weight decay to embedding parameters. We half the learning rate each time the training loss appeared to plateau.

## C. Examples for Image Reconstruction

We provide more examples of in-domain image reconstruction in Figure 11 and out-of domain in Figure 12. We also provide the reconstruction FID of AugVAE-SL on various datasets in Table 4 as a reference for future works. AugVAE-SL trained on ImageNet1K shows " $\leq 8$ " FID for all data domain without extra finetuning. The resolution of each reconstructed image is  $256 \times 256$ .

## D. Examples for Image-to-Text Generation

We provide an example task interface of our human evaluation we mentioned in Section 4.2 in Figure 10. We also provide more examples of image-to-text generation on MS-COCO Captions in Figure 13. All examples in Figure 13 received "*Both captions well describe the image*" in our human evaluation. The resolution of each input image is  $256 \times 256$ .

## E. Examples for Text-to-Image Generation

We provide examples of zero-shot text-to-image generation with L-Verse-CC in Figure 14. Captions are randomly sampled from MS-COCO Captions 2017 validation set. The resolution of each generated image is  $256 \times 256$ .

## F. Discussion

**Bidirectional Learning** L-Verse internally learns a *reversible and densely connected* mapping between images and texts. From this, L-Verse can generate a text or an image in accordance with the given condition without any fine-tuning or extra object detection framework. Bidirectional learning not only saves time and computational cost for training and application. As we mentioned in Section 3.5, our bidirectional approach also mitigates the heterogeneity of data and enables stable FP16 (O2) mixed-precision training.

**Efficiency** The bidirectional training enables L-Verse to efficiently learn the vision-language cross-modal representation with smaller dataset and model size. L-Verse requires 97.6% less data (compared to OSCAR [23]) for image-to-text and 98.8% less data (compared to DALL-E [32]) for text-to-image generation to achieve comparable performances. L-Verse also has 95% less parameters compared to DALL-E, which makes L-Verse more suitable to the environment with limited computing resources.

**Vision-Language Pre-Training** Vision-Language (VL) pre-training from OSCAR surely brings positive effects in learning the cross-modal representation. This also follows the current trend of large scale model training: pre-training with a large data set on a general task and fine-tuning with smaller set to solve downstream tasks. Since we mainly focus on the efficiency over the amount of training data and computing resources, VL pre-training is out-of-scope of this work. However, we also believe that combining VL pre-training with bidirectional training will further improve the performance of L-Verse.

**Large Scale Training** With limited amount of training data and computational resources, we couldn't consider training L-Verse in larger scale like OSCAR, DALL-E or CogView [10]. Nevertheless, our bidirectionally trained L-Verse shows competitive results to other large scale models. As 400M well-filtered text-image dataset [37] has been released recently, we are optimistic about training L-Verse in larger scales.

**Zero-Shot Image Captioning** L-Verse also has an ability to perform zero-shot image captioning when trained on Conceptual Captions (CC) [39]. Unlike MS-COCO Captions [24] which is carefully annotated by humans, images and their raw descriptions in CC are harvested from the web. While texts in CC represent a wider variety of styles, its diversity also adds noise to the caption that L-Verse generates. For this reason, we mainly use L-Verse trained with MS-COCO for the experiment on image captioning.

**Potential Negative Impact** Our findings show excellent performance in both image-to-text and text-to-image generation. L-Verse has a wide range of beneficial applications for society, including image captioning, visual question answering, and text visualization. However, there are still potential malicious or unintended uses of L-Verse including image-to-text or text-to-image generation with social bias. To prevent potential negative impact to our society, we provide open access only to AugVAEs for now.

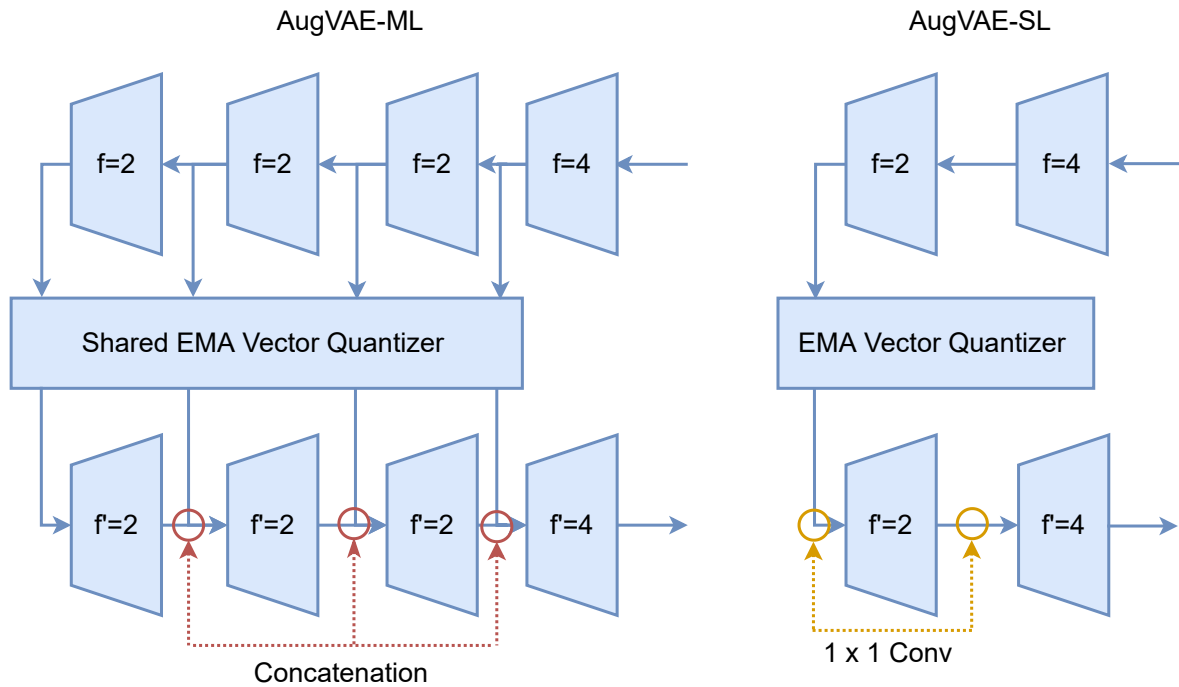

Figure 9. Proposed AugVAE. Trained with cross-level feature augmentation, AugVAE-ML is finetuned into AugVAE-SL to reduce the length of encoded image sequence. We remove unnecessary encoders and decoders from AugVAE-ML and replace the concatenation operation with a  $1 \times 1$  convolution which expands the last dimension of the input tensor by two.

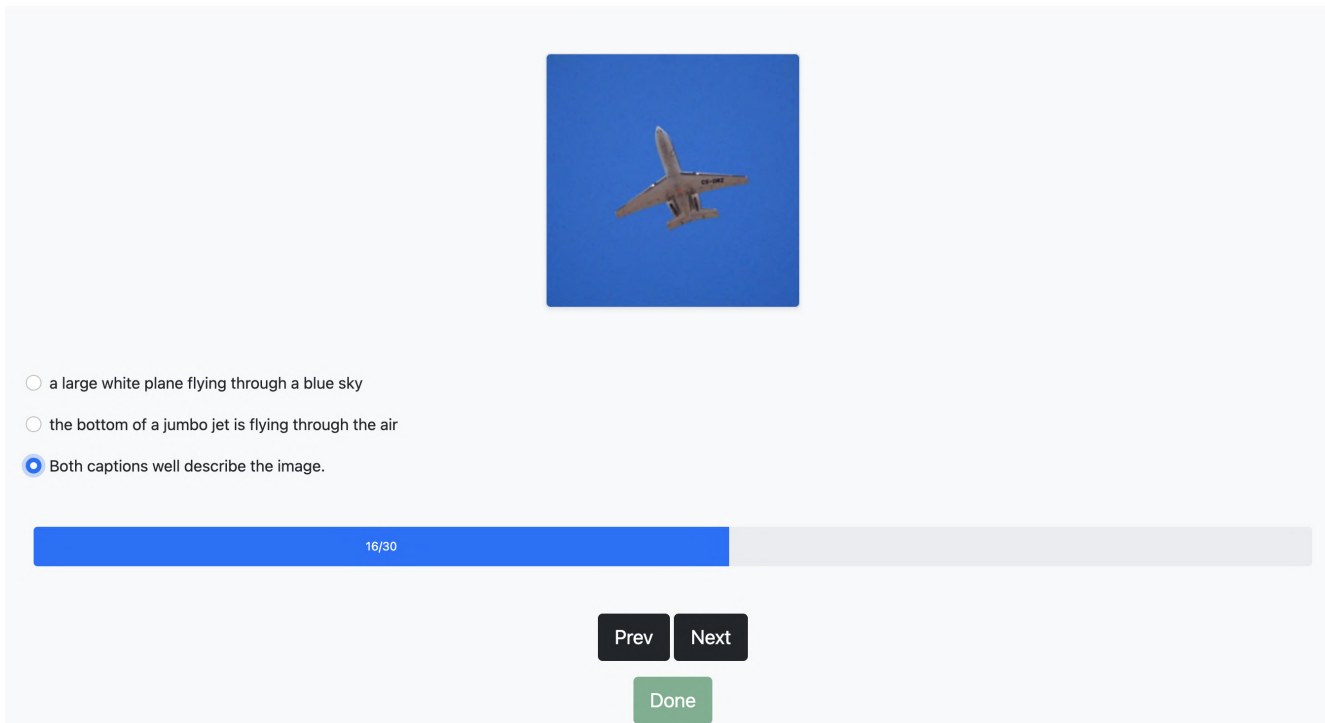

Figure 10. Example interface for human evaluation. Random sampled 30 examples are shown to each participant.



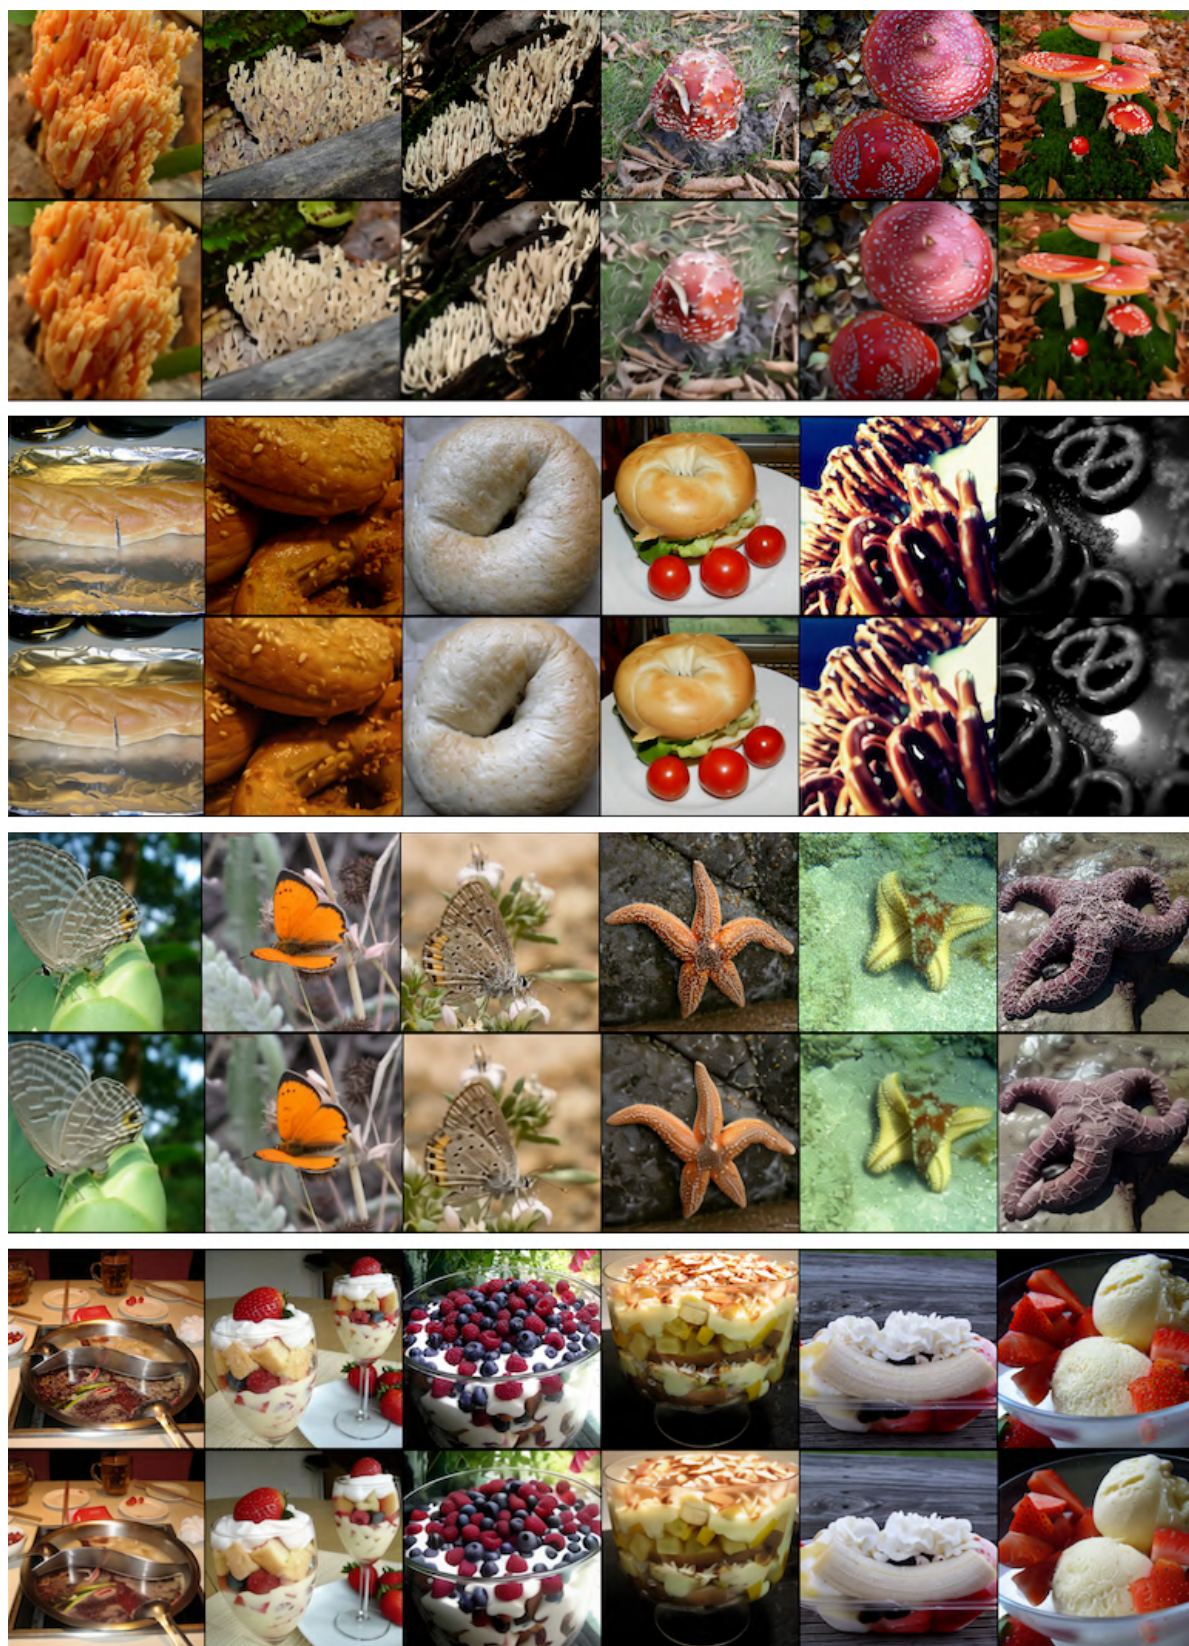

Figure 11. More examples of input images (*top*) and reconstructions from AugVAE-SL (*bottom*) on Imagenet1K validation set. The resolution of each image is  $256 \times 256$  pixels.



CelebA-HQ & FFHQ

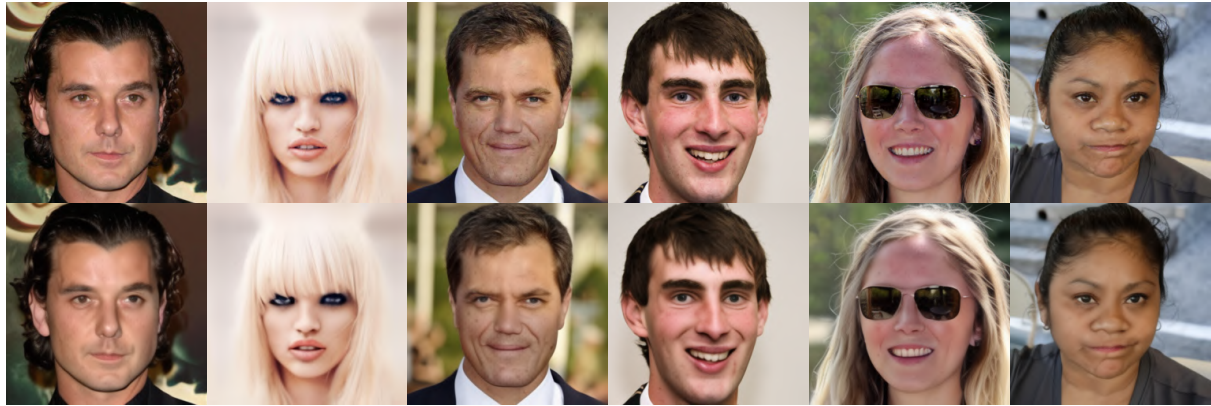

AFHQ

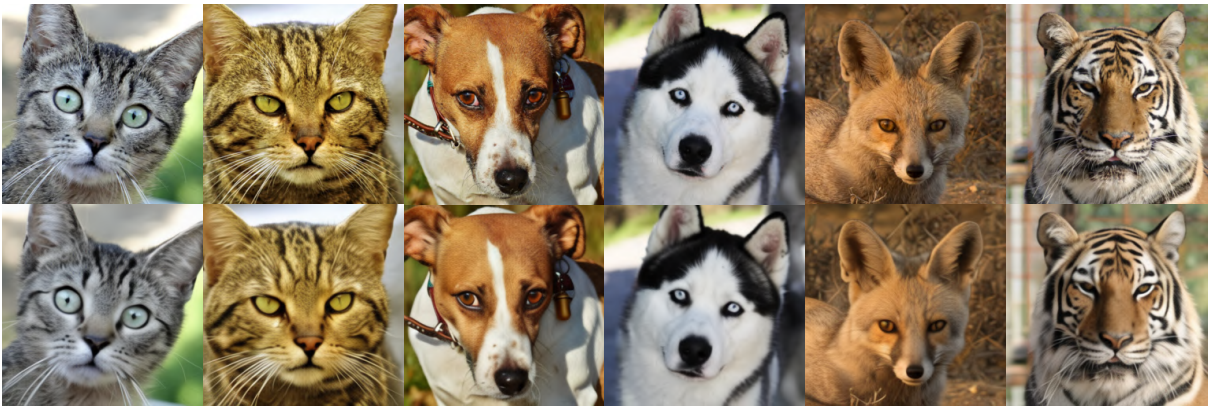

MS-COCO

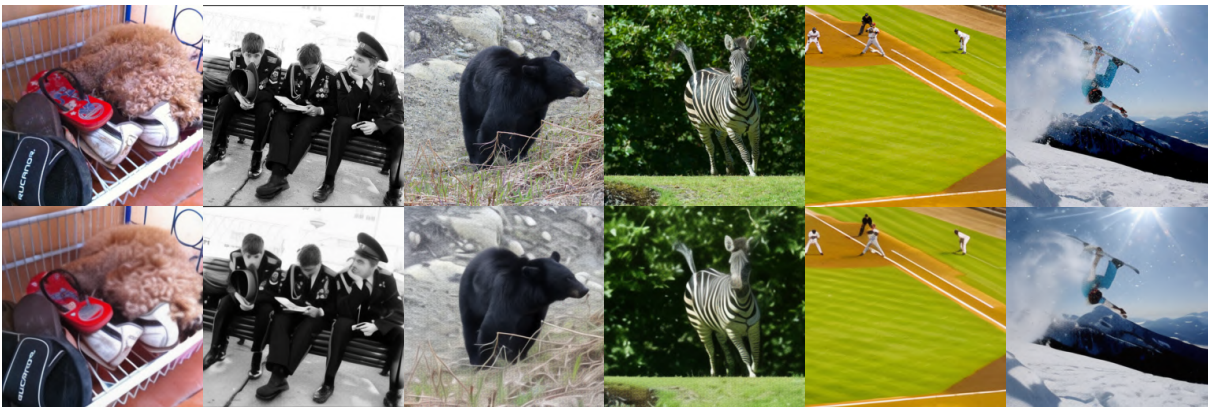

OpenImages

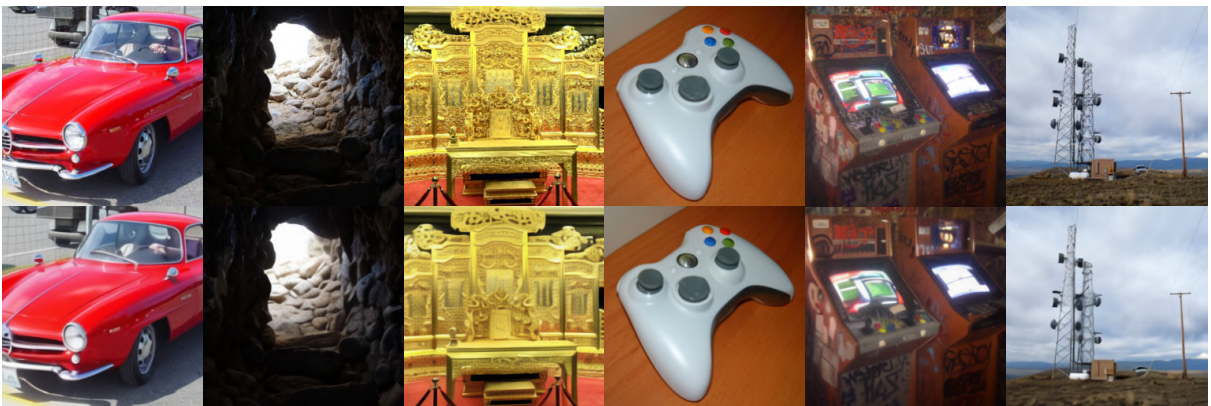

Figure 12. More examples of input images (*top*) and reconstructions from AugVAE-SL (*bottom*) with unseen image domains ( $256 \times 256$  pixels).



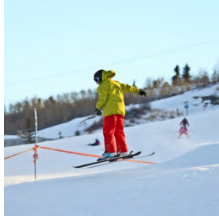

GT: Skier performing jump on high altitude ski slope.

L-Verse: A young person wearing a yellow snow suit skiing down a white hill.

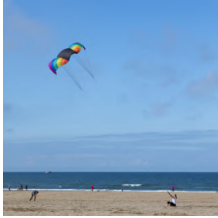

GT: A man is flying a kite at on the shore at the beach.

L-Verse: A person flying a large rainbow kite on a beach.

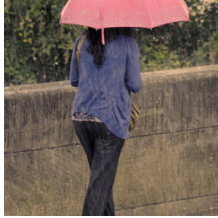

GT: A woman holding an umbrella while walking in the rain.

L-Verse: A woman is standing under an umbrella in the rain.

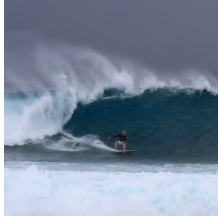

GT: This person is riding a big wave on the water.

L-Verse: A surfer is riding a very large wave.

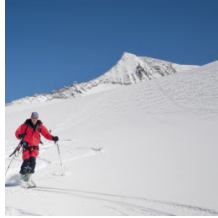

GT: The man is skiing down the snowy hill.

L-Verse: A person in a red ski suit skis down the mountain.

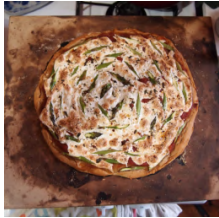

GT: A pizza with lots of cheese on a flat brown surface.

L-Verse: The homemade pizza is freshly baked and ready to be eaten.

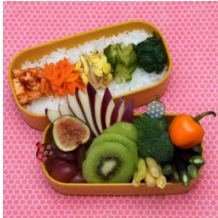

GT: A colorful assortment of different fruits and vegetables.

L-Verse: A plastic container filled with different types of food.

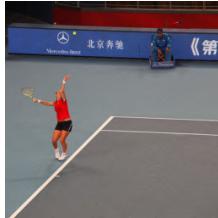

GT: A woman tennis player serving a tennis ball.

L-Verse: A woman playing tennis on a tennis court.

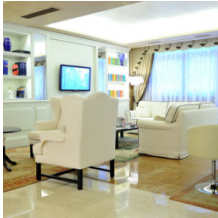

GT: The large living room has been decorated in modern furnishings.

L-Verse: A well furnished living room with modern furniture.

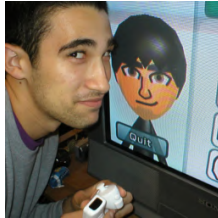

GT: A man holding his face up to a TV with a video game on display.

L-Verse: A man smiling with a set of controls in his hands.

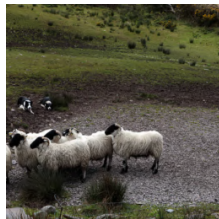

GT: Three look alike dogs are herding sheep into a pile.

L-Verse: A group of sheep walking down a path in the wilderness.

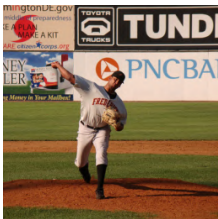

GT: A baseball player is about to throw his best pitch.

L-Verse: A pitcher on a baseball field doing browse wind up.

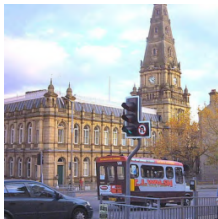

GT: A bus is traveling down the street in front of a large building with a clock tower.

L-Verse: Cars driving in front of a large clock tower.

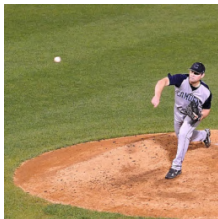

GT: A pitcher for the camden baseball team throws a pitch.

L-Verse: A baseball player pitching a ball on a field.

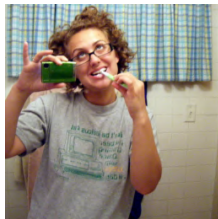

GT: A woman brushing her teeth while taking a selfie.

L-Verse: A woman taking a selfie while brushing her teeth with a tooth brush.

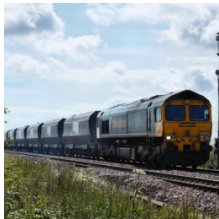

GT: A long train is driving down the tracks.

L-Verse: A train travelling above a field on a sunny day.

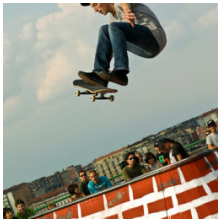

GT: A photo of a man doing a trick on his skateboard.

L-Verse: A skateboarder in the air, performing a trick.

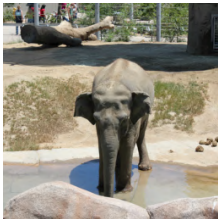

GT: An elephant drinking water in an enclosure at a zoo.

L-Verse: A small elephant standing in a pool of water.

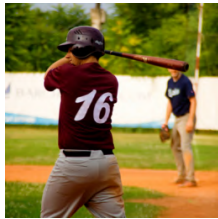

GT: A man in a baseball uniform ready to swing at a pitch.

L-Verse: Baseball player holding bat preparing to swing at a ball.

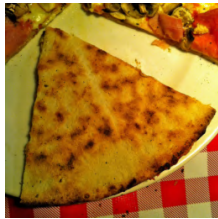

GT: One of the slices of pizza on the dish is turned upside down.

L-Verse: A giant slice of pizza sitting on top of a red checkered table cloth.

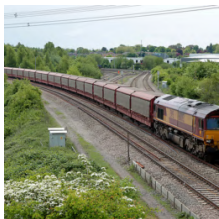

GT: A train pulls past intersection in the rail in a rural area.

L-Verse: A freight train traveling through the countryside.

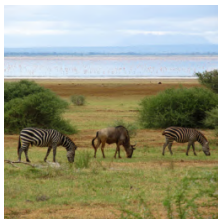

GT: A group of zebras grazing in field next to a body of water.

L-Verse: A group of zebras grazing in field next to a body of water.

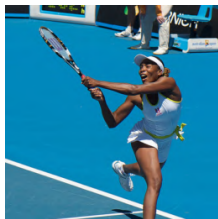

GT: A black woman wearing white attire and shoes running on a court.

L-Verse: A woman swinging a tennis racket towards a tennis ball.

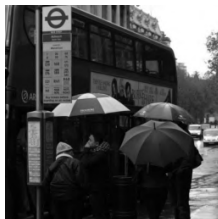

GT: A black and white picture of people walking in the rain under an umbrella.

L-Verse: A group of people with umbrellas standing in front of a bus.

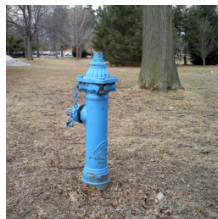

GT: A blue fire hydrant standing close to a tree.

L-Verse: A blue fire hydrant sitting in the middle of a park.

Figure 13. More examples of image-to-text generation on MS-COCO with corresponding ground-truths.



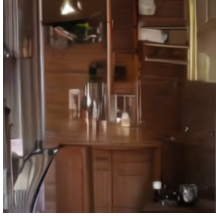

some brown kitchen cabinets in a kitchen and a coffee maker

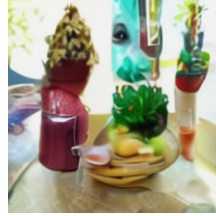

a table filled with different types of vegetables

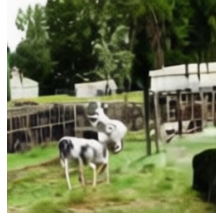

a cow is standing in the grass near a fence .

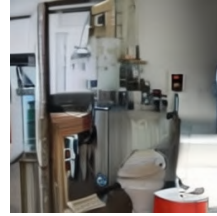

a kitchen area with toilet and various cleaning appliances

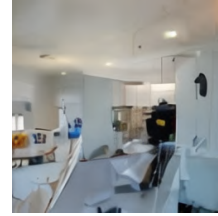

an empty kitchen and living room decorated in white and black

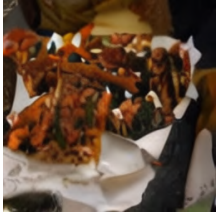

a close up of a plate of food on a table with pizza

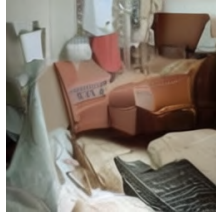

there is a messy bedroom with a bed, desk and chair

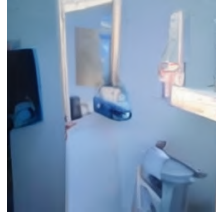

a very clean sink in a bathroom and a towel

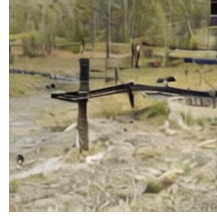

a few animals standing behind a fence in the grass

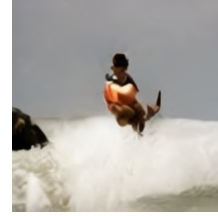

a surferboarder is surfing on a small wave

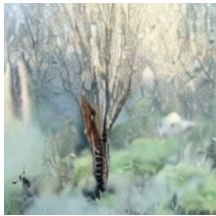

a giraffe walking through the trees , brush and large boulders

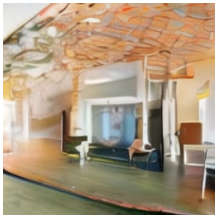

photograph of the inside of a home with unique decorations

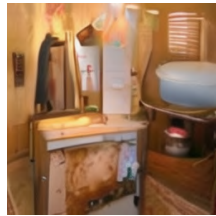

the small bathroom has wooden cabinets around the sink

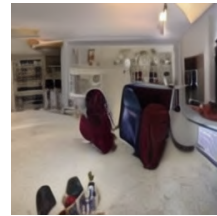

a living room area with a number of couches

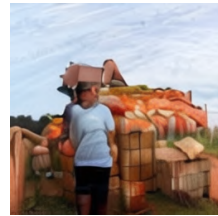

a man wearing a hat standing next to a pile of produce

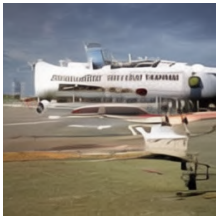

commercial white jet airliner sitting on tarmac area

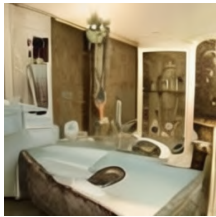

a large bathroom with a vanity, mirror, sink and deep tub

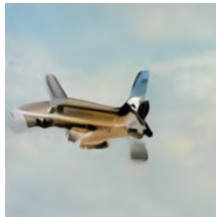

the plane is flying high in the sky

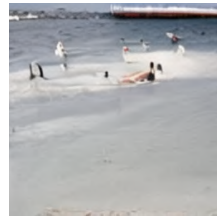

several people swim in the ocean at a beach

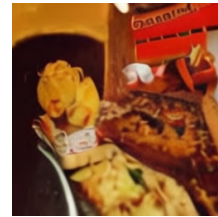

a pan pizza with pepperonis and a spatula

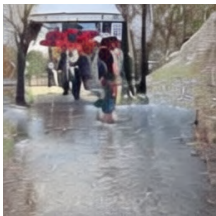

a man is holding an umbrella and walking down the sidewalk

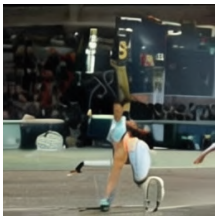

a young man reaches to hit a tennis ball while others watch

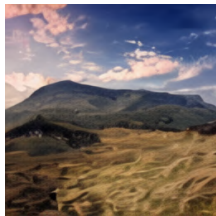

a scenic view of a grassland with mountains in the background

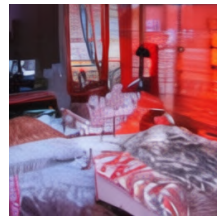

a hotel room features two large beds with red blankets

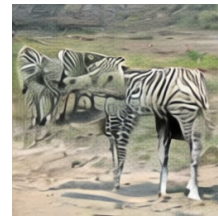

a lot of zebras standing in the field on a hot summer day

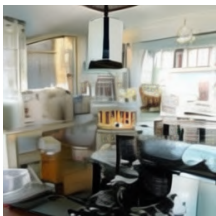

kitchen with silver appliances sun shining in the room

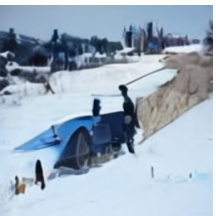

many people are skiing down a hill that is full of snow

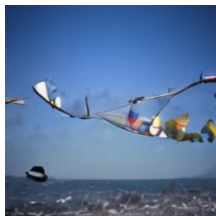

a group of kites are being flown in the air

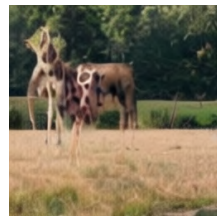

a couple of giraffes that are walking in the grass

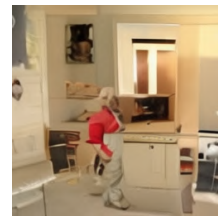

a man standing in a kitchen while closing a cupboard door

Figure 14. Examples of text-to-image generation on MS-COCO.
